# Supplementary material for: Effect of alkali/alkaline-earth-metal doping on the Co3O4 spinel structure and N2O decomposition
Source: Royal Society of Chemistry journal article supplement (doi:10.1039/d4cy00400k), 2024-01-01
Supplement: d4cy00400k1.pdf [file d4cy00400k1.pdf]

## Supporting Information

Bin Kang<sup>1</sup>, Mengfei Guo<sup>1</sup>, Haotian Wu, Xiaonan Guo, Zhaoying Di, Ying Wei, Jingbo  
Jia, Zhou-jun Wang, Runduo Zhang\*

State Key Laboratory of Chemical Resource Engineering, Beijing Key Laboratory of Energy and  
Environmental Catalysis, Beijing University of Chemical Technology, Beijing 100029, China

\*Corresponding author: Runduo Zhang ([zhangrd@mail.buct.edu.cn](mailto:zhangrd@mail.buct.edu.cn))

<sup>1</sup> Bin Kang and Mengfei Guo contributed equally to this work.

## S1. Oxygen isotope exchange (OIE) and equilibrium techniques

As shown in figure S1, the OIE apparatus consists of a vacuum pump, a circulation pump, a heating furnace, a U-shaped microreactor,  $^{18}\text{O}_2$  gas source,  $^{16}\text{O}_2$  gas source, and quartz gas pipelines. The gas circulation volume is  $70\text{ cm}^3$ , with a circulation rate of  $170\text{ cm}^3/\text{s}$ . The gas signals are recorded by a quadrupole mass spectrometer (MS, Omnistar, Pfeiffer Vacuum). About 30 mg of the sample is placed in the reactor and pre-treated at  $300\text{ }^\circ\text{C}$  for 30 min in an  $^{16}\text{O}_2$  atmosphere, followed by cooling to  $50\text{ }^\circ\text{C}$ . Under dynamic vacuum conditions, vacuum pumping is conducted for 30 min to remove excess  $^{16}\text{O}_2$ . Approximately  $65.0 \pm 1.5$  millibars of pure  $^{18}\text{O}_2$  is introduced into the reaction system. The catalyst is then subjected to a temperature programmed heating up to  $600\text{ }^\circ\text{C}$ , while recording changes in the partial pressures of  $^{18}\text{O}_2$  ( $P_{36}$ ),  $^{16}\text{O}_2$  ( $P_{32}$ ), and  $^{16}\text{O}^{18}\text{O}$  ( $P_{34}$ ) using mass spectrometry. Additionally,  $\text{N}_2$  ( $m/z=28$ ) changes are recorded to detect potential leaks in the vacuum system.

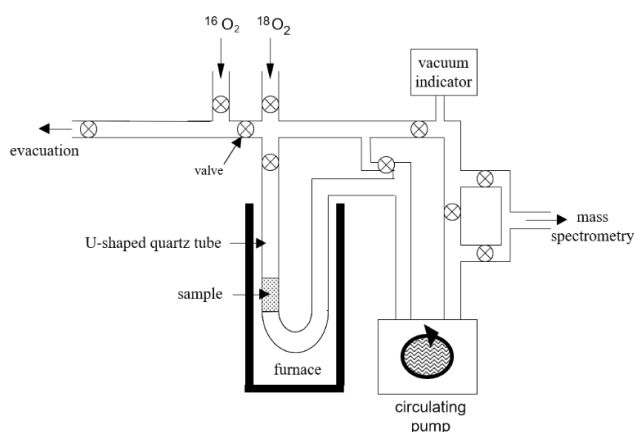

**Figure S1.** Schematic diagram of the oxygen isotopic exchange experiment

According to Royer<sup>S1</sup> and Martin<sup>S2</sup>, the rate of exchange ( $R_e$ , atom/(g s)) is calculated from the rate of disappearance of  $^{18}\text{O}$  from the phase gas at time  $t$  :

$$R_e = -2N_g \cdot \frac{d\alpha_g^t}{dt} = 2N_s \cdot \frac{d\alpha_s^t}{dt} \quad (\text{S1})$$

where  $N_g$  and  $N_s$  are respectively the total number of oxygen atoms in gas phase and the number of exchangeable oxygen atoms at the oxide surface.

$\alpha_g^t$  and  $\alpha_s^t$  are the  $^{18}\text{O}$  atomic fraction in the gas phase and the  $^{18}\text{O}$  atomic fraction

at the surface at each time.

$\alpha_g^t$  is calculated from the partial pressure of  $^{18}\text{O}_2$ ,  $^{16}\text{O}_2$  and  $^{16}\text{O}^{18}\text{O}$  at each time:

$$\alpha_g^t = \frac{\frac{1}{2} \cdot P_{34}^t + P_{36}^t}{P_{32}^t + P_{34}^t + P_{36}^t} \quad (\text{S2})$$

and  $N_g$  is obtained as follows:

$$N_g = \frac{N_A P_t}{R} \left( \frac{V_r}{T_r} + \frac{V_c}{T_c} \right) \quad (\text{S3})$$

where  $N_A$  is Avogadro's number,  $P_T$  is total pressure,  $R$  is the gas constant,  $V_r$  and  $V_c$  are the volumes of the heated and nonheated parts of the system,  $T_r$  and  $T_c$  are the temperatures of the heated and nonheated parts of the system.

In the test conditions, the initial rate of exchange was calculated from the initial slopes with respect to time of the partial pressure of  $^{18}\text{O}_2$  ( $\frac{dP_{36}^0}{dt}$ ) and  $^{16}\text{O}^{18}\text{O}$  ( $\frac{dP_{34}^0}{dt}$ ):

$$R_e = -\frac{N_A}{R} \left( \frac{V_r}{T_r} + \frac{V_c}{T_c} \right) \left( 2 \frac{dP_{36}^0}{dt} + \frac{dP_{34}^0}{dt} \right) \quad (\text{S4})$$

The number of exchanged atoms at each time is calculated from the number of  $^{18}\text{O}$  atoms at time  $t$ :

$$N_e^t = (\alpha_g^0 - \alpha_g^t) N_g \quad (\text{S5})$$

## S2. $\text{N}_2$ adsorption-desorption isotherms and BJH pore-size distributions of different samples

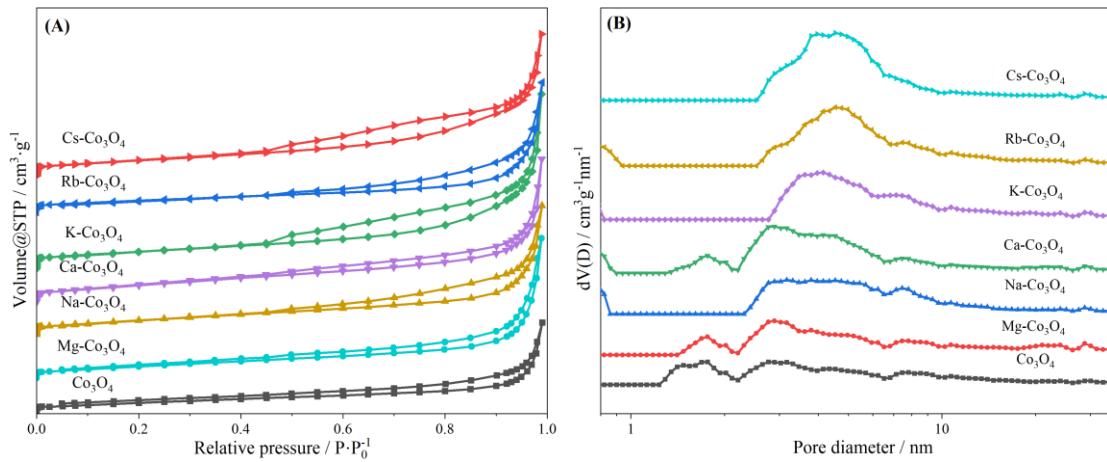

**Figure S2.**  $\text{N}_2$  adsorption-desorption isotherms (A) and BJH pore-size distributions

(B) of different samples

### References

- S1. D. Martin and D. Duprez, *J. Phys. Chem.*, 1996, **100**, 9429-9438.
- S2. S. Royer, D. Duprez and S. Kaliaguine, *J. Catal.*, 2005, **234**, 364-375.
